# Supplementary material for: Effects of High and Low Protein Diets on Inflammatory Profiles in People with Morbid Obesity: A 3-Week Intervention Study
Source: PubMed Central journal article supplement (PMC7759799; doi:10.3390/nu12123636), 2020-11-26
Supplement: nutrients-12-03636-s001.pdf [file nutrients-12-03636-s001.pdf]

**Supplementary Figure 1.** Flow diagram of study population

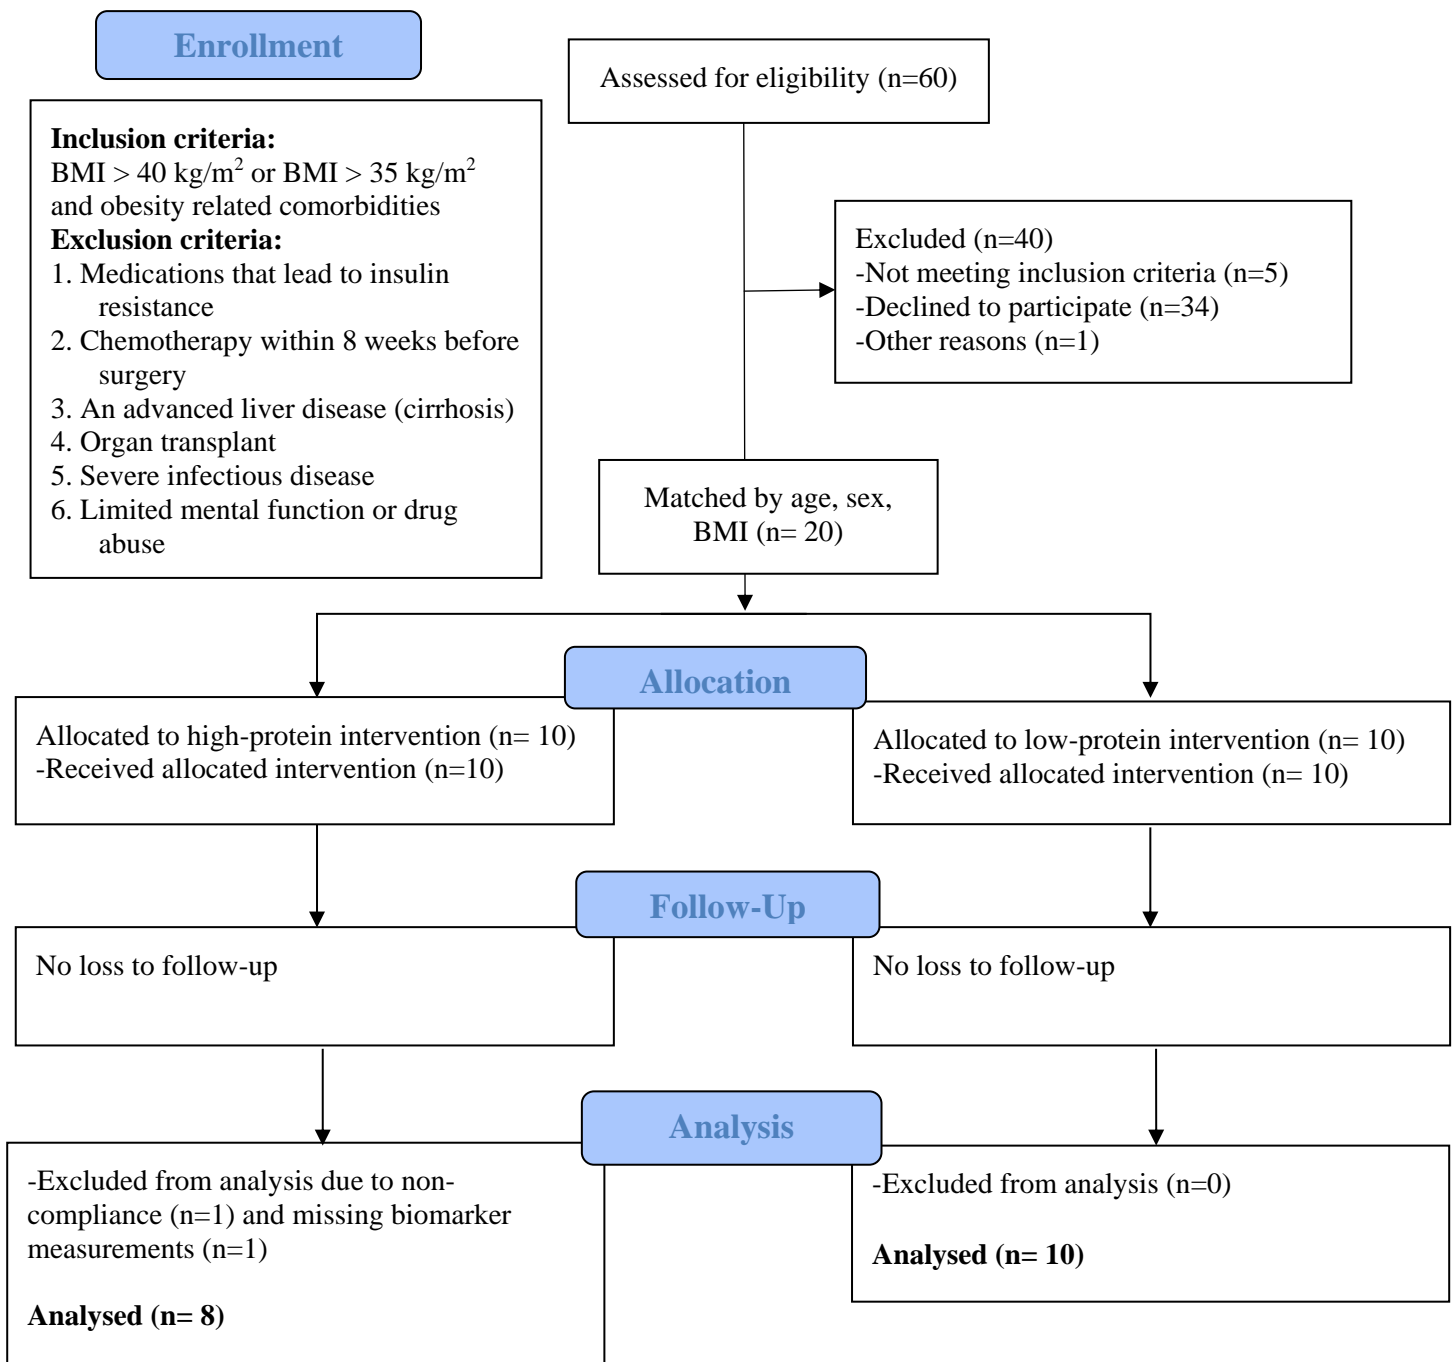

**Supplementary Table 1.** Nutrient composition of LP and HP diet groups.

|                      |    | <b>LP group</b> | <b>HP group</b> | <i>P</i> -value* |
|----------------------|----|-----------------|-----------------|------------------|
| Energy               |    | 1608.9±7.6      | 1611.1±6.1      | 0.516            |
| <b>Protein</b>       | E% | 9.5±0.5         | 32.2±0.7        | <.0001           |
|                      | g  | 37.5±2.0        | 126.7±2.5       | <.0001           |
| Methionine           | mg | 483.7±28.4      | 3074.6±105.4    | <.0001           |
| BCAA                 | mg | 5984.4±343.5    | 24998.3±559.5   | <.0001           |
| <b>Carbohydrates</b> | E% | 58.0±1.1        | 38.1±1.0        | <.0001           |
|                      | g  | 229.3±5.3       | 150.0±3.9       | <.0001           |
| Glucose              | g  | 19.2±2.0        | 11.2±0.8        | <.0001           |
| Fructose             | g  | 25.9±3.4        | 13.4±1.5        | <.0001           |
| Saccharose           | g  | 47.6±3.6        | 23.4±2.6        | <.0001           |
| Starch               | g  | 122.2±6.7       | 61.2±3.0        | <.0001           |
| Fibers, soluble      | g  | 10.6±0.5        | 7.0±0.4         | <.0001           |
| Fibers, insoluble    | g  | 24.1±1.4        | 14.3±0.7        | <.0001           |
| <b>Fat</b>           | E% | 28.2±0.9        | 27.0±1.5        | 0.047            |
|                      | g  | 50.2±1.4        | 48.0±2.7        | 0.037            |
| <b>Fatty acids</b>   |    |                 |                 |                  |
| SFA                  | g  | 11.4±1.1        | 21.2±1.6        | <.0001           |
| MUFA                 | g  | 19.1±1.1        | 14.8±0.9        | <.0001           |
| PUFA                 | g  | 16.0±1.8        | 7.7±1.1         | <.0001           |

Analysis of dietary plans were performed by PRODI 6.1 expert (Nutriscience, Stuttgart, Germany). Abbreviations: BCAA, branched-chain amino acids leucine, isoleucine, valine; SFA, saturated fatty acids; MUFA, monounsaturated fatty acids; PUFA, polyunsaturated fatty acids.

\**P*-values are based on the *t*-test

**Supplementary Table 2.** Spearman partial correlation coefficients and 95% CIs for immune-inflammatory biomarkers, measured at baseline and adjusted for age, sex, and BMI

|                          | CRP          |             | IL-6         |             | TNF-a       |             | IL-10       |             | MCP-1       |              | Chemerin    |             | Omentin     |             | Leptin |             | Total adiponectin |        | HMW adiponectin |        |
|--------------------------|--------------|-------------|--------------|-------------|-------------|-------------|-------------|-------------|-------------|--------------|-------------|-------------|-------------|-------------|--------|-------------|-------------------|--------|-----------------|--------|
|                          | $\rho$       | 95% CI      | $\rho$       | 95% CI      | $\rho$      | 95% CI      | $\rho$      | 95% CI      | $\rho$      | 95% CI       | $\rho$      | 95% CI      | $\rho$      | 95% CI      | $\rho$ | 95% CI      | $\rho$            | 95% CI | $\rho$          | 95% CI |
| <b>IL-6</b>              | 0.71         | 0.28, 0.89  |              |             |             |             |             |             |             |              |             |             |             |             |        |             |                   |        |                 |        |
| <i>P</i> -value          | <b>0.002</b> |             |              |             |             |             |             |             |             |              |             |             |             |             |        |             |                   |        |                 |        |
| <b>TNF-a</b>             | -0.07        | -0.56, 0.46 | 0.08         | -0.46, 0.56 |             |             |             |             |             |              |             |             |             |             |        |             |                   |        |                 |        |
| <i>P</i> -value          | <b>0.82</b>  |             | <b>0.79</b>  |             |             |             |             |             |             |              |             |             |             |             |        |             |                   |        |                 |        |
| <b>IL-10</b>             | 0.13         | -0.41, 0.60 | -            | -0.52, 0.51 | 0.14        | -0.40, 0.61 |             |             |             |              |             |             |             |             |        |             |                   |        |                 |        |
| <i>P</i> -value          | <b>0.64</b>  |             | <b>0.98</b>  |             | <b>0.62</b> |             |             |             |             |              |             |             |             |             |        |             |                   |        |                 |        |
| <b>MCP-1</b>             | -0.11        | -0.59, 0.43 | 0.11         | -0.43, 0.59 | 0.38        | -0.17, 0.74 | -           | -0.70, 0.26 |             |              |             |             |             |             |        |             |                   |        |                 |        |
| <i>P</i> -value          | <b>0.70</b>  |             | <b>0.69</b>  |             | <b>0.16</b> |             | <b>0.27</b> |             |             |              |             |             |             |             |        |             |                   |        |                 |        |
| <b>Chemerin</b>          | 0.09         | -0.44, 0.57 | 0.42         | -0.12, 0.76 | -0.01       | -0.52, 0.50 | -           | -0.60, 0.41 | 0.32        | -0.24, 0.71  |             |             |             |             |        |             |                   |        |                 |        |
| <i>P</i> -value          | <b>0.75</b>  |             | <b>0.11</b>  |             | <b>0.96</b> |             | <b>0.66</b> |             | <b>0.26</b> |              |             |             |             |             |        |             |                   |        |                 |        |
| <b>Omentin</b>           | -0.06        | -0.55, 0.47 | 0.31         | -0.25, 0.71 | -0.39       | -0.75, 0.16 | -           | -0.57, 0.44 | -           | -0.82, -0.02 | 0.19        | -0.36, 0.64 |             |             |        |             |                   |        |                 |        |
| <i>P</i> -value          | <b>0.84</b>  |             | <b>0.26</b>  |             | <b>0.15</b> |             | <b>0.75</b> |             | <b>0.04</b> |              | <b>0.50</b> |             |             |             |        |             |                   |        |                 |        |
| <b>Leptin</b>            | 0.32         | -0.24, 0.71 | 0.64         | 0.16, 0.86  | 0.20        | -0.36, 0.64 | -           | -0.80, 0.49 | 0.37        | -0.19, 0.74  | 0.44        | -0.10, 0.77 | 0.09        | -0.45, 0.57 |        |             |                   |        |                 |        |
| <i>P</i> -value          | <b>0.24</b>  |             | <b>0.009</b> |             | <b>0.49</b> |             | <b>0.06</b> |             | <b>0.18</b> |              | <b>0.10</b> |             | <b>0.76</b> |             |        |             |                   |        |                 |        |
| <b>Total adiponectin</b> | 0.13         | -0.42, 0.60 | 0.17         | -0.38, 0.62 | -0.31       | -0.70, 0.25 | -           | -0.76, 0.41 | 0.14        | -0.79, 0.48  | 0.05        | -0.48, 0.54 | 0.46        | -0.09, 0.78 | 0.25   | -0.31, 0.67 |                   |        |                 |        |

|                               |             |                |             |                |             |                |             |                |             |                |             |                |             |                |             |                |             |                |             |                |
|-------------------------------|-------------|----------------|-------------|----------------|-------------|----------------|-------------|----------------|-------------|----------------|-------------|----------------|-------------|----------------|-------------|----------------|-------------|----------------|-------------|----------------|
| <i>P</i> -value               | <b>0.66</b> |                | <b>0.55</b> |                | <b>0.27</b> |                | <b>0.13</b> |                | <b>0.07</b> |                | <b>0.88</b> |                | <b>0.09</b> |                | <b>0.37</b> |                |             |                |             |                |
| <b><i>HMW adiponectin</i></b> | 0.37        | -0.41,<br>0.82 | 0.52        | -0.25,<br>0.87 | -0.53       | -0.88,<br>0.24 | -           | -0.86,<br>0.48 | -           | -0.78,<br>0.27 | 0.39        | -0.39,<br>0.83 | 0.33        | -0.44,<br>0.81 | 0.45        | -0.33,<br>0.85 | 0.12        | -0.59,<br>0.72 |             |                |
| <i>P</i> -value               | <b>0.35</b> |                | <b>0.16</b> |                | <b>0.15</b> |                | <b>0.20</b> |                | <b>0.50</b> |                | <b>0.31</b> |                | <b>0.40</b> |                | <b>0.23</b> |                | <b>0.76</b> |                |             |                |
| <b><i>Fetuin-A</i></b>        | -0.01       | -0.52,<br>0.50 | 0.08        | -0.45,<br>0.57 | 0.13        | -0.41,<br>0.60 | -           | -0.81,<br>0.52 | -           | -0.63,<br>0.19 | 0.37        | -0.57,<br>0.44 | 0.39        | -0.17,<br>0.75 | 0.21        | -0.34,<br>0.65 | 0.24        | -0.31,<br>0.67 | 0.09        | -0.61,<br>0.71 |
| <i>P</i> -value               | <b>0.97</b> |                | <b>0.79</b> |                | <b>0.65</b> |                | <b>0.04</b> |                | <b>0.52</b> |                | <b>0.75</b> |                | <b>0.16</b> |                | <b>0.45</b> |                | <b>0.39</b> |                | <b>0.82</b> |                |

Analysis includes all subjects at baseline (n=18). Abbreviations: CI, confidence interval; CRP, C-reactive protein; HMW, high molecular weight; IFN $\gamma$ , interferon gamma, IL, interleukin; MCP1, monocyte chemoattractant protein-1; TNF $\alpha$ , tumor necrosis factor alpha;  $\rho$ , Spearman's rank correlation coefficient

**Supplementary Table 3.** Exemplary food plans for both intervention groups

|                     | Low-protein diet                      | High-protein diet                         |
|---------------------|---------------------------------------|-------------------------------------------|
| <b>Breakfast</b>    | 50 g bread                            | <u>Protein shake</u>                      |
|                     | 10 g margarine                        | 30 g protein shake**                      |
|                     | 20 g jam                              | 300g 1.5% fat milk                        |
|                     | 20 g Nutella                          | <u>Toast with jam</u>                     |
|                     | 200 g coffee/tea                      | 30 g whole wheat toast                    |
|                     |                                       | 5 g margarine                             |
|                     |                                       | 15 g jam                                  |
|                     |                                       | 200 g coffee/tea                          |
|                     |                                       | 20 g 1.5% fat milk                        |
|                     |                                       |                                           |
| <b>Snack</b>        | 100 g raw cucumber                    | 125 g orange without peel                 |
|                     | 500 g mineral water                   | 500 g mineral water                       |
| <b>Lunch</b>        | <u>Pasta with vegetable bolognese</u> | <u>Pork steak with potatoes and green</u> |
|                     |                                       | <u>beans</u>                              |
|                     | 120 g raw pasta                       | 175 g roast pork steak                    |
|                     | 350 g vegetable bolognese             | 5 g oil                                   |
|                     | 80 g margarine                        | 150 g potatoes                            |
|                     | 500 g mineral water                   | 200 g green beans                         |
|                     |                                       | 500 g mineral water                       |
| <b>Coffee break</b> | <u>Carrot-apple salad</u>             | 125 g berries                             |
|                     | 80 g raw apple                        | 10 g sugar                                |
|                     | 120 g raw carrot                      | 200 g coffee/tea                          |
|                     | 2 g lemon juice                       | 20g 1.5% fat milk                         |
|                     | 10 g sunflower seed                   |                                           |
|                     | 200 g coffee/tea                      |                                           |
| <b>Dinner</b>       | <u>Bread with avocado</u>             | <u>Protein shake</u>                      |

120 g whole grain bread

80 g avocado

50 g tomatoes

3 g lemon juice

Bread with spread\*

20 g vegan spread

80 g raw kiwi

1000 g mineral water/tea

30 g protein shake\*\*

300g 1.5% fat milk

Bread with cheese

50 g rye bread

5 g margarine

30 g 45% fat Gouda

Mixed salad

50 g lettuce

20 g canned sweetcorn

100 g cucumber

80 g tomatoes

3 g aromatic vinegar

5 g oil

1 g herbal salt

1000 g mineral water/tea

---

\*Vegetarian 'spreads' (Alnatura, Bickenbach, Germany); \*\*Protein shake (WellMix Sport Protein 90, WellMix, Burgwedel, Germany). Ingredients include 42% calcium caseinate, 40% soy protein isolate and 17% whey protein

**Supplementary Table 4.** Detection limits (lower level) of ELISA kits per measured biomarker

| <b>Biomarker</b>  | <b>Detection limit</b> |
|-------------------|------------------------|
| CRP               | 0.10 mg/L              |
| IL-6              | 0.33 pg/ml             |
| TNF-a             | 0.51 pg/ml             |
| IL-10             | 0.14 pg/ml             |
| MCP-1             | 0.74 pg/ml             |
| Chemerin          | 0.1 ng/ml              |
| Omentin           | 0.5 ng/ml              |
| Leptin            | 15.6 pg/ml             |
| Total adiponectin | 0.47 ng/ml             |
| HMW adiponectin   | 1.5 ng/ml              |
| Fetuin-A          | 0.104 ng/ml            |

Abbreviations: CRP, C-reactive protein; HMW, high molecular weight; IFN $\gamma$ , interferon gamma, IL, interleukin; MCP1, monocyte chemoattractant protein-1; TNF $\alpha$ , tumor necrosis factor alpha
